# Supplementary material
Source: Research Square preprint supplement (doi:10.21203/rs.3.rs-10155365/v1)
Supplement: Supplementary file 1 [file 9fce1dc3ee2e6fb84e4fbaae.docx]

**Supplementary Material**

*Heat, wind, and the calendar: why a warming climate makes its own performance effects unidentifiable in 24 years of the IRONMAN World Championship*

Andreas Will, Romuald Lepers, Beat Knechtle

# S1. Data provenance and the early-era women's transition limitation

Source: official results, ironman.com. For some women's editions (2002 to 2010 and 2012), 92 to 97% of records show overall time equal to the exact sum of the three splits, indicating that transition times are folded into the splits rather than reported separately; men in the same editions show the expected 5 to 9 min of separate transition. This is documented here as an unfixable provenance limitation and does not affect the environmental conclusions.

# S2. Cleaning and descriptive statistics

Quality filters on the assembled records: negative residual (n = 284); physiologically impossible split (n = 13 additional); transition > 30 min (n = 231); 528 records (1.2%) removed in total. Cohort definition (a priori): able-bodied finishers in the standard age groups through 65 to 69 together with professionals; athletes aged 70 and over and handicapped or para divisions are outside the cohort and absent from the working dataset. Final n = 42,605.

**Table S2a. Cohort composition: finishers by age band and sex (n = 42,605).**

| **Age band** | **Women** | **Men** | **Total** |
| --- | --- | --- | --- |
| 18-24 | 582 | 775 | 1,357 |
| 25-29 | 1,177 | 2,035 | 3,212 |
| 30-34 | 1,790 | 3,676 | 5,466 |
| 35-39 | 1,879 | 4,677 | 6,556 |
| 40-44 | 2,063 | 5,242 | 7,305 |
| 45-49 | 1,798 | 4,465 | 6,263 |
| 50-54 | 1,448 | 3,432 | 4,880 |
| 55-59 | 1,001 | 2,068 | 3,069 |
| 60-64 | 601 | 1,199 | 1,800 |
| 65-69 | 244 | 694 | 938 |
| Professional | 751 | 1,005 | 1,756 |
| Total | 13,334 | 29,271 | 42,605 |

**Table S2b. Demographic shift across the study period.**

| **Period** | **n** | **% women** | **Age-group median age** | **Age-group % aged 50+** | **% professional** |
| --- | --- | --- | --- | --- | --- |
| 2002-2009 | 12,404 | 25.1 | 35 | 17.7 | 6.7 |
| 2010-2017 | 15,452 | 27.8 | 40 | 25.2 | 3.6 |
| 2018-2025 | 14,749 | 40.2 | 45 | 34.0 | 2.4 |

*The field grew older and substantially more female across the period; both trends are part of the secular change that the sex-specific year smooth absorbs, and they illustrate why year-aligned predictors such as race-day heat are difficult to separate from the era. These trends are consistent with longer-run findings for the Hawaii Ironman and for Ironman age-group fields generally [22,25].*

**Table S2c. Split and finish times, median [IQR] (h:mm), by sex and cohort.**

| **Group (n)** | **Swim** | **Bike** | **Run** | **Overall** |
| --- | --- | --- | --- | --- |
| Women, age-group (12,583) | 1:17 [1:10-1:27] | 6:13 [5:50-6:44] | 4:22 [3:57-5:01] | 12:02 [11:13-13:18] |
| Women, professional (751) | 1:00 [0:57-1:05] | 5:16 [5:01-5:29] | 3:22 [3:12-3:35] | 9:44 [9:22-10:12] |
| Men, age-group (28,266) | 1:09 [1:03-1:18] | 5:28 [5:09-6:00] | 3:56 [3:34-4:36] | 10:45 [10:01-11:58] |
| Men, professional (1,005) | 0:53 [0:51-0:56] | 4:43 [4:32-4:57] | 3:06 [2:58-3:21] | 8:52 [8:31-9:19] |

**Table S2d. Race-day day-reference WBGT by edition, ranked (23 race days, 2002–2025).**

| **Rank** | **Year** | **Date** | **Day-reference WBGT (°C)** | **Note** |
| --- | --- | --- | --- | --- |
| 1 | 2017 | 2017-10-14 | 28.84 |  |
| 2 | 2022 | 2022-10-06 | 28.54 | 2022 women’s race |
| 3 | 2019 | 2019-10-12 | 28.40 |  |
| 4 | 2024 | 2024-10-26 | 28.25 |  |
| 5 | 2015 | 2015-10-10 | 28.11 |  |
| 6 | 2022 | 2022-10-08 | 27.82 | 2022 men‘s race |
| 7 | 2025 | 2025-10-11 | 27.64 |  |
| 8 | 2023 | 2023-10-14 | 27.41 |  |
| 9 | 2018 | 2018-10-13 | 27.14 |  |
| 10 | 2002 | 2002-10-19 | 26.95 |  |
| 11 | 2009 | 2009-10-10 | 26.83 |  |
| 12 | 2007 | 2007-10-13 | 26.52 |  |
| 13 | 2016 | 2016-10-08 | 26.50 |  |
| 14 | 2014 | 2014-10-11 | 26.12 |  |
| 15 | 2013 | 2013-10-12 | 26.05 |  |
| 16 | 2004 | 2004-10-16 | 26.03 |  |
| 17 | 2012 | 2012-10-13 | 25.84 |  |
| 18 | 2011 | 2011-10-08 | 25.81 |  |
| 19 | 2010 | 2010-10-09 | 25.44 |  |
| 20 | 2003 | 2003-10-18 | 25.31 |  |
| 21 | 2006 | 2006-10-21 | 25.14 |  |
| 22 | 2005 | 2005-10-15 | 25.03 |  |
| 23 | 2008 | 2008-10-11 | 24.55 |  |

*Day-reference WBGT is the mean solar-inclusive wet-bulb globe temperature (Liljegren) over the 09:00–16:00 window at the run-course centroid (ERA5 via Open-Meteo), identical for all athletes on a given date. The 2022 season comprised two championship races (women’s, 6 October; men’s, 8 October).*

# S3. Start-time and split-timing table

Each course waypoint was sampled at the clock time at which an athlete at the cohort median split times would pass it. The schedule below is derived from validated start times and cumulative median splits by sex and cohort.

**Table S3. Validated start times and median split times by edition, sex and cohort, used for waypoint sampling.**

| **Year** | **Sex** | **Cohort** | **n** | **Start** | **Swim** | **Bike** | **Run** | **Run start** |
| --- | --- | --- | --- | --- | --- | --- | --- | --- |
| 2002 | F | AG | 267 | 07:00 | 01:19 | 06:20 | 04:28 | 14:39 |
| 2002 | F | PRO | 34 | 06:45 | 01:01 | 05:21 | 03:41 | 13:07 |
| 2002 | M | AG | 1040 | 07:00 | 01:10 | 05:38 | 04:09 | 13:55 |
| 2002 | M | PRO | 56 | 06:45 | 00:56 | 04:54 | 03:12 | 12:38 |
| 2003 | F | AG | 323 | 07:00 | 01:17 | 06:24 | 04:27 | 14:42 |
| 2003 | F | PRO | 33 | 06:45 | 00:59 | 05:26 | 03:34 | 13:10 |
| 2003 | M | AG | 1104 | 07:00 | 01:09 | 05:40 | 03:59 | 13:57 |
| 2003 | M | PRO | 65 | 06:45 | 00:53 | 04:56 | 03:13 | 12:39 |
| 2004 | F | AG | 315 | 07:00 | 01:18 | 06:50 | 04:20 | 15:09 |
| 2004 | F | PRO | 35 | 06:45 | 01:04 | 06:00 | 03:27 | 13:49 |
| 2004 | M | AG | 1107 | 07:00 | 01:10 | 06:05 | 04:00 | 14:25 |
| 2004 | M | PRO | 55 | 06:45 | 00:57 | 05:19 | 03:12 | 13:05 |
| 2005 | F | AG | 381 | 07:00 | 01:22 | 06:08 | 04:12 | 14:29 |
| 2005 | F | PRO | 44 | 06:45 | 01:04 | 05:22 | 03:30 | 13:11 |
| 2005 | M | AG | 1141 | 07:00 | 01:12 | 05:25 | 03:51 | 13:46 |
| 2005 | M | PRO | 74 | 06:45 | 00:55 | 04:48 | 03:12 | 12:32 |
| 2006 | F | AG | 357 | 07:00 | 01:22 | 06:15 | 04:13 | 14:37 |
| 2006 | F | PRO | 49 | 06:45 | 01:05 | 05:23 | 03:29 | 13:13 |
| 2006 | M | AG | 1097 | 07:00 | 01:12 | 05:27 | 03:51 | 13:48 |
| 2006 | M | PRO | 63 | 06:45 | 00:54 | 04:47 | 03:07 | 12:31 |
| 2007 | F | AG | 379 | 07:00 | 01:20 | 06:25 | 04:11 | 14:46 |
| 2007 | F | PRO | 44 | 06:45 | 01:03 | 05:31 | 03:24 | 13:19 |
| 2007 | M | AG | 1138 | 07:00 | 01:10 | 05:37 | 03:52 | 13:55 |
| 2007 | M | PRO | 62 | 06:45 | 00:56 | 04:55 | 03:08 | 12:41 |
| 2008 | F | AG | 390 | 07:00 | 01:19 | 06:29 | 04:12 | 14:48 |
| 2008 | F | PRO | 43 | 06:45 | 01:05 | 05:30 | 03:28 | 13:20 |
| 2008 | M | AG | 1065 | 07:00 | 01:09 | 05:37 | 03:49 | 13:55 |
| 2008 | M | PRO | 65 | 06:45 | 00:56 | 04:55 | 03:11 | 12:41 |
| 2009 | F | AG | 379 | 07:00 | 01:20 | 06:16 | 04:19 | 14:36 |
| 2009 | F | PRO | 39 | 06:45 | 01:02 | 05:26 | 03:31 | 13:14 |
| 2009 | M | AG | 1084 | 07:00 | 01:10 | 05:33 | 03:58 | 13:52 |
| 2009 | M | PRO | 76 | 06:45 | 00:55 | 04:55 | 03:15 | 12:40 |
| 2010 | F | AG | 412 | 07:00 | 01:21 | 06:07 | 04:05 | 14:28 |
| 2010 | F | PRO | 40 | 06:45 | 01:03 | 05:20 | 03:25 | 13:09 |
| 2010 | M | AG | 1209 | 07:00 | 01:09 | 05:23 | 03:46 | 13:41 |
| 2010 | M | PRO | 49 | 06:45 | 00:54 | 04:42 | 03:05 | 12:26 |
| 2011 | F | AG | 447 | 07:00 | 01:15 | 05:56 | 04:08 | 14:20 |
| 2011 | F | PRO | 26 | 06:45 | 01:01 | 05:07 | 03:16 | 12:57 |
| 2011 | M | AG | 1223 | 07:00 | 01:10 | 05:22 | 03:48 | 13:40 |
| 2011 | M | PRO | 35 | 06:45 | 00:52 | 04:37 | 03:02 | 12:18 |
| 2012 | F | AG | 470 | 07:00 | 01:20 | 06:15 | 04:11 | 14:36 |
| 2012 | F | PRO | 26 | 06:45 | 01:02 | 05:22 | 03:14 | 13:10 |
| 2012 | M | AG | 1282 | 07:00 | 01:10 | 05:30 | 03:52 | 13:48 |
| 2012 | M | PRO | 35 | 06:45 | 00:54 | 04:47 | 03:05 | 12:30 |
| 2013 | F | AG | 493 | 07:00 | 01:12 | 05:49 | 04:09 | 14:10 |
| 2013 | F | PRO | 27 | 06:45 | 00:59 | 05:08 | 03:17 | 12:57 |
| 2013 | M | AG | 1374 | 07:00 | 01:08 | 05:14 | 03:47 | 13:30 |
| 2013 | M | PRO | 41 | 06:45 | 00:51 | 04:41 | 03:04 | 12:22 |
| 2014 | F | AG | 528 | 07:00 | 01:17 | 06:27 | 04:11 | 14:53 |
| 2014 | F | PRO | 32 | 06:30 | 01:00 | 05:15 | 03:15 | 12:50 |
| 2014 | M | AG | 1356 | 06:50 | 01:11 | 05:30 | 03:50 | 13:40 |
| 2014 | M | PRO | 36 | 06:25 | 00:52 | 04:38 | 03:01 | 12:00 |
| 2015 | F | AG | 560 | 07:00 | 01:18 | 06:16 | 04:23 | 14:44 |
| 2015 | F | PRO | 26 | 06:30 | 01:00 | 05:11 | 03:17 | 12:46 |
| 2015 | M | AG | 1469 | 06:50 | 01:12 | 05:26 | 04:02 | 13:38 |
| 2015 | M | PRO | 38 | 06:25 | 00:53 | 04:35 | 03:09 | 11:58 |
| 2016 | F | AG | 565 | 07:00 | 01:11 | 06:10 | 04:14 | 14:31 |
| 2016 | F | PRO | 36 | 06:30 | 00:59 | 05:15 | 03:20 | 12:49 |
| 2016 | M | AG | 1422 | 06:50 | 01:05 | 05:28 | 03:53 | 13:32 |
| 2016 | M | PRO | 43 | 06:25 | 00:51 | 04:38 | 03:03 | 11:58 |
| 2017 | F | AG | 581 | 07:00 | 01:14 | 06:08 | 04:24 | 14:32 |
| 2017 | F | PRO | 28 | 06:30 | 00:58 | 05:05 | 03:17 | 12:38 |
| 2017 | M | AG | 1502 | 06:50 | 01:08 | 05:26 | 04:07 | 13:33 |
| 2017 | M | PRO | 41 | 06:25 | 00:49 | 04:36 | 03:07 | 11:55 |
| 2018 | F | AG | 594 | 07:00 | 01:12 | 05:46 | 04:23 | 14:08 |
| 2018 | F | PRO | 32 | 06:30 | 00:58 | 04:50 | 03:15 | 12:23 |
| 2018 | M | AG | 1567 | 06:50 | 01:07 | 05:04 | 03:56 | 13:10 |
| 2018 | M | PRO | 44 | 06:25 | 00:51 | 04:20 | 03:03 | 11:41 |
| 2019 | F | AG | 568 | 07:12 | 01:16 | 06:09 | 04:19 | 14:47 |
| 2019 | F | PRO | 35 | 06:30 | 00:59 | 05:01 | 03:21 | 12:35 |
| 2019 | M | AG | 1563 | 07:12 | 01:08 | 05:24 | 03:52 | 13:53 |
| 2019 | M | PRO | 41 | 06:25 | 00:52 | 04:28 | 02:59 | 11:50 |
| 2022-10-06 | F | AG | 1140 | 07:15 | 01:17 | 06:16 | 04:35 | 15:01 |
| 2022-10-06 | F | PRO | 32 | 06:30 | 00:58 | 04:57 | 03:18 | 12:31 |
| 2022-10-06 | M | AG | 1031 | 07:15 | 01:14 | 05:53 | 04:30 | 14:35 |
| 2022-10-08 | M | AG | 2327 | 07:15 | 01:09 | 05:17 | 04:02 | 13:51 |
| 2022-10-08 | M | PRO | 44 | 06:25 | 00:50 | 04:22 | 03:01 | 11:42 |
| 2023 | F | AG | 1954 | 07:15 | 01:19 | 06:14 | 04:42 | 15:03 |
| 2023 | F | PRO | 46 | 06:30 | 00:57 | 04:51 | 03:15 | 12:23 |
| 2024 | M | AG | 2165 | 07:15 | 01:09 | 05:23 | 04:01 | 13:59 |
| 2024 | M | PRO | 42 | 06:25 | 00:48 | 04:10 | 03:00 | 11:28 |
| 2025 | F | AG | 1480 | 07:15 | 01:22 | 06:12 | 04:27 | 15:03 |
| 2025 | F | PRO | 44 | 06:30 | 00:56 | 04:55 | 03:20 | 12:27 |

*Times are h:mm. Start is the gun time; run start is the clock time at which the median athlete of each group began the marathon. Pass times at intermediate waypoints were interpolated from these split times.*

# S4. Variables and index definitions

All model variables and the three derived environmental indices are defined below. Split times (BTSS, RTSS, STSS, OTSS) are durations in seconds; the wind index is expressed as a time-equivalent penalty.

**Table S4. Variables and derived indices.**

| **Variable** | **Role** | **Definition** | **Unit** |
| --- | --- | --- | --- |
| RTSS | outcome | Run split duration | s |
| BTSS | outcome / predictor | Bike split duration | s |
| STSS / OTSS | descriptor | Swim split / overall finish time | s |
| BikeFinishClock | predictor | Clock time at bike finish (run-start proxy) | h |
| WBGT_day_ref | predictor | Fixed-window (09:00 to 16:00) race-day WBGT at run-course centroid | °C |
| WBGT_bike | predictor | Distance-integrated cycling-segment WBGT | °C·km |
| WBGT_run_mean | predictor | Mean run-window WBGT intensity (robustness) | °C |
| TWI | predictor | Total wind index: head/tail/cross/gust + elevation, time-equivalent | s-equiv |
| sex | factor | Athlete sex (F / M) | – |
| age_category | factor | 18 to 44 / 45 to 69 / professional | – |
| Bike_Era | factor | Optimization era (≥2016) versus earlier years (single indicator) | – |
| Run_era | factor | Pre-Carbon ≤2016 / Carbon-Plated ≥2017 | – |
| Year | numeric | Race year (secular trend) | year |

# S5. Methods retained and methods dropped

Each departure from the earlier preprint analysis is listed below with its identifiability rationale.

**Table S5. Analytical choices revised, with rationale.**

| **Choice** | **Status** | **Reason / replacement** |
| --- | --- | --- |
| Time-weighted cumulative heat load (°C·h) | Dropped | Mechanically proportional to segment duration (circular); replaced by intensity (°C) and an exogenous day-reference WBGT |
| Partial dependence plots and PDP thresholds | Dropped | Unreliable under correlated predictors (wind-heat r ≈ −0.4 to −0.6); replaced by accumulated local effects |
| Wet-bulb temperature without solar load | Dropped | Solar load is a major outdoor heat component; replaced by solar-inclusive WBGT (Liljegren) |
| Single composite “fraction from cycling conditions” | Dropped | Conflated performance carryover with environment; replaced by a nested ΔR² decomposition |
| Apparent-wind TWI involving rider speed | Corrected | Implementation uses a linear meteorological-wind penalty; the methods text was corrected to match the code |
| Three-level bike-technology era | Simplified | Cycling change is continuous and absorbed by the year smooth; a single Optimization indicator is retained only as a coarse control |

# S6. Sensitivity analyses

The run-side variance decomposition was re-estimated under each analytical choice (Table S6a): detrended heat (linear versus flexible year trend), carbon-era boundary (2017 versus 2019), inclusion versus exclusion of the technology-era controls and the cycling-era level count, basis-dimension sensitivity, and intensity versus exogenous heat. The single-station versus distributed comparison is summarized in Table S6b and in Figure 6 of the main text.

Across every specification the environmental increment to run-time variance remained between 0.003 and 0.007, against a performance-carryover increment of about 0.38 throughout (Table S6a). Moving the carbon-plate boundary from 2017 to 2019, or removing the technology-era controls, changed the increment by at most 0.002. Replacing the flexible year smooth with a linear trend, the detrended check called for by the heat-year concurvity (worst-case 0.88), left the increment at 0.003. Varying the smooth basis dimension (k = 5 to 12) and substituting duration-independent run intensity for the exogenous day-reference WBGT also left it negligible, the largest value (0.007, run-intensity metric) remaining more than fifty times smaller than the performance carryover. The environmental coupling therefore stayed statistically indistinguishable from the main estimate under all choices, so the conclusion that the bike-to-run coupling reflects athlete ability rather than conditions does not depend on them.

**Table S6a. Robustness of the run-side variance decomposition to analytical choices (adjusted R²). ΔR² env. is the environmental increment; the main analysis reports 0.003.**

| **Analysis** | **Variant** | **R² base** | **+ perf.** | **+ env.** | **ΔR² perf.** | **ΔR² env.** |
| --- | --- | --- | --- | --- | --- | --- |
| Carbon-era boundary | 2017 (main) | 0.219 | 0.599 | 0.602 | 0.379 | 0.003 |
|  | 2019 | 0.219 | 0.599 | 0.602 | 0.380 | 0.004 |
|  | none | 0.219 | 0.597 | 0.601 | 0.378 | 0.005 |
| Technology-era controls | included (main) | 0.219 | 0.599 | 0.602 | 0.379 | 0.003 |
|  | excluded | 0.219 | 0.597 | 0.601 | 0.378 | 0.005 |
| Year trend | flexible (main) | 0.219 | 0.599 | 0.602 | 0.379 | 0.003 |
|  | linear (detrended) | 0.213 | 0.591 | 0.594 | 0.378 | 0.003 |
| Basis dimension | k = 5 (main) | 0.219 | 0.599 | 0.602 | 0.379 | 0.003 |
|  | k = 8 | 0.220 | 0.603 | 0.606 | 0.383 | 0.004 |
|  | k = 12 | 0.220 | 0.604 | 0.607 | 0.384 | 0.003 |
| Run-heat metric | exogenous day-ref (main) | 0.219 | 0.599 | 0.602 | 0.379 | 0.003 |
|  | duration-independent intensity | 0.219 | 0.595 | 0.602 | 0.376 | 0.007 |

*Cycling-era level count: the cycling-era term enters only the bike model, as a coarse control for continuous equipment change that the year smooth largely absorbs. Under the single Optimization indicator the identified wind effect is unchanged (bike R² = 0.392; s(TWI) F = 179.1), so the level-count coding does not affect the run-side environmental decomposition.*

**Table S6b. Single-station versus distributed comparison (race-day values across 23 editions).**

| **Reference point** | **Heat: r vs course** | **Heat: r vs year** | **Wind: r vs course** | **Mean wind (m s⁻¹)** |
| --- | --- | --- | --- | --- |
| Pier (start/finish) | 0.87 | 0.75 | 0.20 | 4.6 |
| Airport (Queen K) | 0.86 | 0.69 | 0.59 | 6.9 |
| Hawi (bike turnaround) | 0.81 | 0.22 | 0.86 | 16.9 |
| Distributed course | – | 0.55 | – | 8.5 |

*Heat (wet-bulb) is reproduced by any single station and stays year-confounded; course wind is captured only by distributed sampling, and the coastal stations disagree on which days are windy (pier vs Hawi wind r = −0.01).*

# S7. STROBE checklist

**Table S7. STROBE checklist (cross-sectional reporting), mapped to manuscript sections.**

| **Item** | **STROBE recommendation (abbreviated)** | **Location** |
| --- | --- | --- |
| 1 | Title and abstract: design in title/abstract; informative summary | Title; Abstract |
| 2 | Background and rationale | Intro 1 |
| 3 | Objectives, with research questions | Intro 1 (RQ1 to RQ4) |
| 4 | Study design | Methods 2.1, 2.5 |
| 5 | Setting, locations, dates | Methods 2.1, 2.3 |
| 6 | Participants and eligibility | Methods 2.1, 2.2 |
| 7 | Variables (outcomes, predictors, confounders) | Methods 2.3 to 2.5; Table S4 |
| 8 | Data sources and measurement | Methods 2.1, 2.3; S4 |
| 9 | Bias (circularity, confounding, identifiability) | Methods 2.4; Results 3.1, 3.2 |
| 10 | Study size | Methods 2.1, 2.2 (n = 42,605) |
| 11 | Quantitative variables and indices | Methods 2.3; S4 |
| 12 | Statistical methods, triangulation, sensitivity | Methods 2.5; S6 |
| 13 | Participants (numbers, exclusions) | Methods 2.2; S2 |
| 14 | Descriptive data | S2 (Table S2) |
| 15 | Outcome data | Results 3.1 to 3.5 |
| 16 | Main results with estimates and uncertainty | Results; Table 1 |
| 17 | Other analyses (ALE, single-station, sensitivity) | Results 3.4, 3.5; S6 |
| 18 | Key results | Discussion 4 (opening) |
| 19 | Limitations | Discussion 4 (Limitations) |
| 20 | Interpretation | Discussion 4 |
| 21 | Generalizability | Discussion 4 (methodological traps) |
| 22 | Funding | Declarations |
